# Supplementary material for: Beyond conventional electrocatalysts: hollow nanoparticles for improved and sustainable oxygen reduction reaction activity
Source: Royal Society of Chemistry journal article supplement (doi:10.1039/c4ta03975k), 2014-01-01
Supplement: c4ta03975k1.pdf [file c4ta03975k1.pdf]

## Supporting Information for

# Beyond Conventional Electrocatalysts: Hollow Nanoparticles for Improved and Sustainable Oxygen Reduction Reaction Activity

Laetitia Dubau,<sup>a, b, \*</sup> Miguel Lopez-Haro,<sup>a, b, c</sup> Julien Durst,<sup>d</sup> Laure Guétaz,<sup>e</sup> Pascale Bayle-Guillemaud,<sup>e</sup> Marian Chatenet,<sup>a, b, f</sup> and Frédéric Maillard<sup>a, b, \*</sup>

### Content:

Supplementary Figures S1 to S4

Supplementary Table S1

References

## EXAFS Measurements Performed on the Pt-Ni/C and the Pt-Ni/C-AT Catalysts

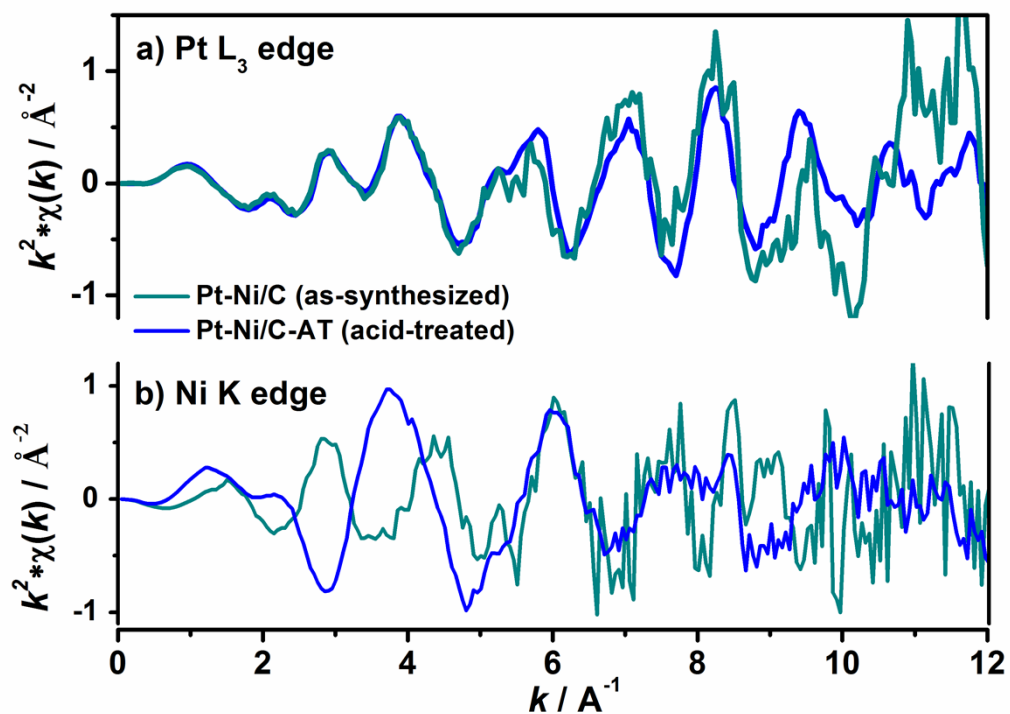

**Figure S1.**  $k^2$  weighted EXAFS spectra measured at the (A) Pt L<sub>3</sub> and (B) the Ni K edges on the Pt-Ni/C (blue) and the Pt-Ni/C-AT (dark cyan lines) catalysts.

## EXAFS Measurements Performed on the Pt-Ni/C and the Pt-Ni/C-AT Catalysts

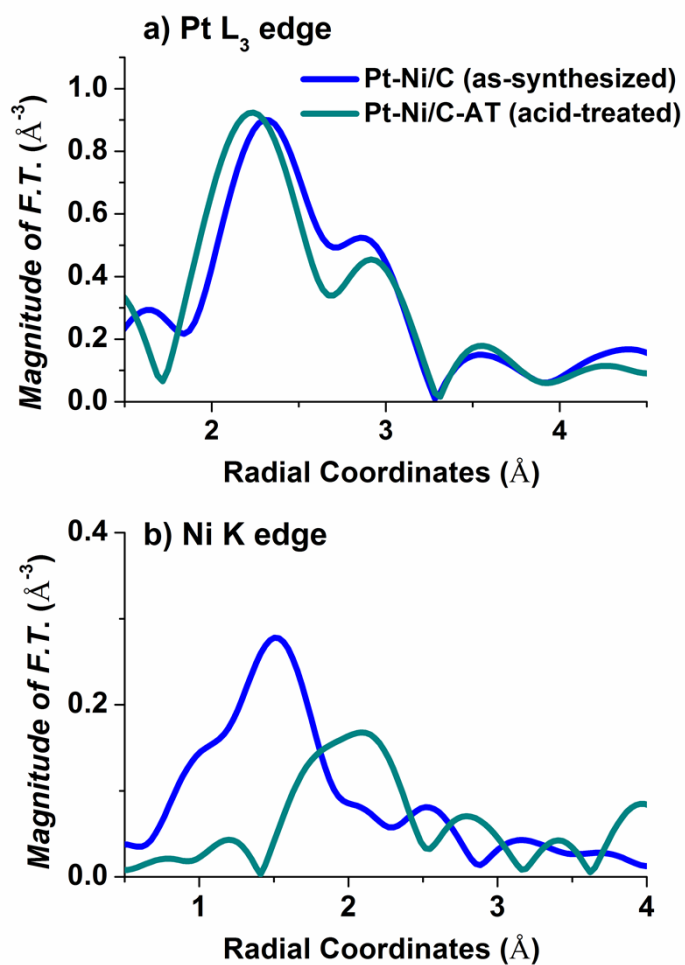

**Figure S2.** Fourier transform (FT) magnitudes of the  $k^2\chi(k)$  EXAFS spectra measured at the a) Pt L<sub>3</sub> and b) Ni K edges for the Pt-Ni/C (blue) and the Pt-Ni/C-AT (dark cyan lines) catalysts.

## Representative EEL Spectra Measured in the Core/Shell Areas of a Hollow Pt-Ni/C-AT Nanoparticle

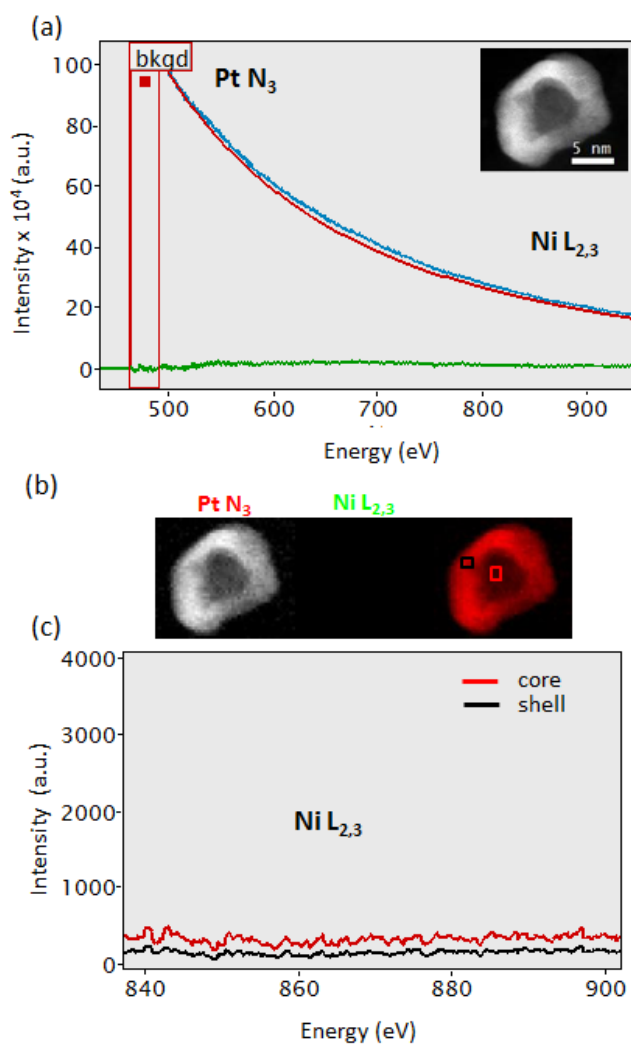

**Figure S3.** (a) Representative EEL spectra measured on a hollow Pt-Ni/C-AT nanoparticle. The brutto signal is displayed in blue, the background subtraction using a power law function is shown in red and the background-subtracted signal is displayed in green. The inset displays the ADF image of the analyzed Pt-Ni/C-AT nanoparticle. (b) Pt  $N_3$  and Ni  $L_{2,3}$  elemental mapping and (c) Background subtracted EEL spectra extracted from the sites marked in black (nanoparticle shell) and red (nanoparticle core) rectangles.

## Representative EEL Spectra Measured in the Core/Shell Areas of a Core-Shell Pt-Ni/C-AT Nanoparticle

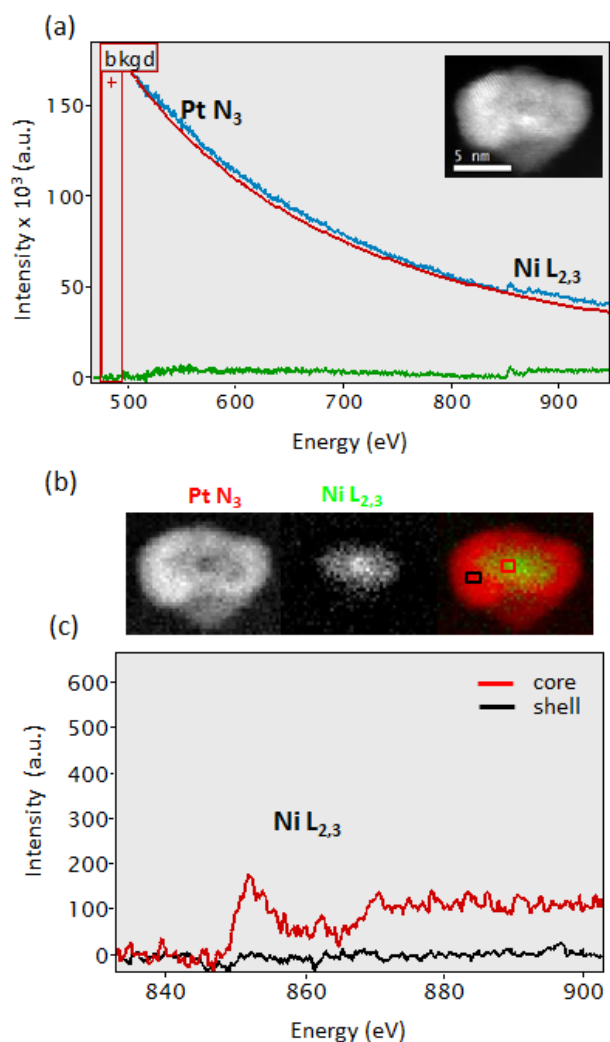

**Figure S4.** (a) Representative EEL spectra measured on a core-shell Pt-Ni/C-AT nanoparticle. The brutto signal is displayed in blue, the background subtraction using a power law function is shown in red and the background-subtracted signal is displayed in green. The inset displays the ADF image of the analyzed Pt-Ni/C-AT nanoparticle. (b) Pt  $L_{2,3}$  and Ni  $L_{2,3}$  elemental mapping and (c) Background subtracted EEL spectra extracted from the sites marked in black (nanoparticle shell) and red (nanoparticle core) rectangles.

**Table S1. Structural parameters obtained from the best fits of the FTs for the Pt-Ni/C and the Pt-Ni/C-AT electrocatalysts (Pt edge).  $\sigma^2$  is the mean square radial disorder, and the  $R$ -factor indicates the quality of the fit from which the data reported in this table are extracted.**

| Catalyst   | Shell | $N_{\text{Pt-Pt}}$ | Interatomic distance / nm | $\sigma^2$ (x $10^5$ ) / $\text{nm}^2$ | $E_0$ / $(\Delta E_0)$ eV | $R$ -factor |
|------------|-------|--------------------|---------------------------|----------------------------------------|---------------------------|-------------|
| Pt-Ni/C    | Pt-Pt | $7.5 \pm 0.7$      | $0.273 \pm 0.001$         | $4.5 \pm 0.1$                          | $6 \pm 3$                 | 0.03        |
| Pt-Ni/C-AT | Pt-Pt | $7.5 \pm 3.5$      | $0.273 \pm 0.001$         | $3.8 \pm 5$                            | $6 \pm 1$                 | 0.02        |
